# Supplementary material
Source: PubMed Central journal article supplement (PMC8012404)
Supplement: NIHMS1677386-supplement-1.pdf [file NIHMS1677386-supplement-1.pdf]

**Supplemental Table 1:**  
**Pearson's Correlations of UCLA Loneliness Score with Other Variables by Age Group and Site**

|                                   | Age 50-65       |                 | Age $\geq$ 90  |                | $\chi^2$ | <i>p</i> |
|-----------------------------------|-----------------|-----------------|----------------|----------------|----------|----------|
|                                   | CIAO<br>(N=212) | SAGE<br>(N=138) | CIAO<br>(N=47) | SAGE<br>(N=85) |          |          |
| Total medical conditions reported | .087            | .058            | .011           | -.066          | 1.460    | .691     |
| General Health Rating             | -.108           | -.317 ***       | -.240          | -.378 ***      | 6.415    | .093     |
| Sleep Quality                     | -.201 **        | -.173 *         | -.184          | -.390 **       | 3.222    | .359     |
| CESD Happiness Scale              | -.425 **        | -.642 ***       | -.638 *        | -.594 ***      | 6.790    | .079     |
| BMI                               | .030            | .141            | .261           | .106           | 2.527    | .470     |

\*  $p = <.01$ ; \*\*  $p = <.001$ ; \*\*\*  $p = <.001$

**Supplemental Tables 2a and 2b:**

**Supplemental Table 2a: Pearson's Correlations of SD-WISE Total Score with 5 Variables by Age Group and Site**

|                                   | Age 50-65       |                 | Age $\geq$ 90  |                | $\chi^2$ | <i>p</i> |
|-----------------------------------|-----------------|-----------------|----------------|----------------|----------|----------|
|                                   | CIAO<br>(N=212) | SAGE<br>(N=138) | CIAO<br>(N=47) | SAGE<br>(N=85) |          |          |
| Total medical conditions reported | -.107           | -.129           | -.163          | .014           | 1.393    | .707     |
| General Health Rating             | .111            | .429 ***        | .092           | .453 ***       | 14.502   | .002 *   |
| Sleep Quality                     | .172 *          | .171 *          | .225           | .353 *         | 2.495    | .476     |
| CESD Happiness Scale              | .534 ***        | .552 ***        | .340           | .601 ***       | 2.541    | .468     |
| BMI                               | -.078           | -.020           | -.175          | .258 *         | 8.630    | .035     |

\*  $p = <.01$ ; \*\*  $p = <.001$ ; \*\*\*  $p = <.001$

**Supplemental Table 2b: Pearson's Correlations of SD-WISE Total Score with Other Variables by Age Group and Site – Pairwise significance (*p*-values)**

|                                   | 1 vs 2 | 1 vs 3 | 2 vs 4 | 3 vs 4 |
|-----------------------------------|--------|--------|--------|--------|
| Total medical conditions reported | N/A    | N/A    | N/A    | N/A    |
| General Health Rating             | 0.0002 | 1      | 1      | 0.1361 |
| Sleep Quality                     | N/A    | N/A    | N/A    | N/A    |
| CESD Happiness Scale              | N/A    | N/A    | N/A    | N/A    |
| BMI                               | 0.9166 | 0.9166 | 0.1901 | 0.1108 |

Note: 1--Age 50-65 CIAO, 2--Age 50-65 SAGE, 3--Age  $\geq$ 90 CIAO, 4--Age  $\geq$ 90 SAGE

Holm Adjustment was used to adjust for multiple comparisons of the pairwise significances.

NA = Not Applicable as the ANOVAs in Table 5b were not significant.
